# Supplementary material for: Salt stress-induced alterations in the root proteome of barley genotypes with contrasting response towards salinity
Source: PubMed Central journal article supplement — J Exp Bot. 2009 Aug;60(12):3545–57. doi: 10.1093/jxb/erp198 (PMC2724703; doi:10.1093/jxb/erp198), 2009-08
Supplement: erp198_1.pdf [file erp198_1.pdf]

## Salt stress-induced alterations in the root proteome of barley genotypes with contrasting response towards salinity

*Katja Witzel, Annette Weidner, Giridara Kumar Surabhi, Andreas Boerner, and Hans-Peter Mock*

### Supplementary material

Supplementary Table 1: Effect of salinity stress on the dry weight of root and leaves in barley cultivars Morex and Steptoe. Plants were harvested after 13 days of stress treatment at NaCl levels ranging from 0 – 250 mM and the dry weight was determined. Values represent the mean  $\pm$  standard error of 20 plants. Statistical differences between treatments were analyzed following the Duncan multiple range tests. Asterisks indicate significant differences at  $p < 0.05$  as compared to the control.

| NaCl concentration [mM] | Second leaf [mg]  | Third leaf [mg]   | Root [mg]         |
|-------------------------|-------------------|-------------------|-------------------|
| <b>Morex</b>            |                   |                   |                   |
| 0                       | 42,00 $\pm$ 2,38  | 40,80 $\pm$ 2,50  | 37,00 $\pm$ 2,40  |
| 50                      | 36,90 $\pm$ 1,23  | 33,95 $\pm$ 2,78* | 34,00 $\pm$ 1,93  |
| 100                     | 36,75 $\pm$ 1,50  | 17,55 $\pm$ 1,51* | 26,05 $\pm$ 1,42* |
| 150                     | 40,65 $\pm$ 1,97  | 16,70 $\pm$ 1,72* | 24,60 $\pm$ 1,51* |
| 200                     | 36,89 $\pm$ 2,11  | 7,53 $\pm$ 1,21*  | 18,26 $\pm$ 1,02* |
| 250                     | 40,39 $\pm$ 2,49  | 5,89 $\pm$ 1,45*  | 18,17 $\pm$ 1,39* |
| <b>Steptoe</b>          |                   |                   |                   |
| 0                       | 54,50 $\pm$ 1,97  | 30,45 $\pm$ 2,21  | 49,25 $\pm$ 2,71  |
| 50                      | 51,75 $\pm$ 1,29  | 26,65 $\pm$ 2,37  | 49,00 $\pm$ 1,99  |
| 100                     | 49,40 $\pm$ 2,19  | 4,10 $\pm$ 0,66*  | 33,40 $\pm$ 1,82* |
| 150                     | 54,25 $\pm$ 2,83  | 1,33 $\pm$ 0,28*  | 36,80 $\pm$ 2,48* |
| 200                     | 40,75 $\pm$ 2,85* | 0,50 $\pm$ 0,17*  | 23,95 $\pm$ 1,44* |
| 250                     | 42,65 $\pm$ 2,51* | 0,45 $\pm$ 0,06*  | 24,40 $\pm$ 1,44* |

Supplementary Table 2: The identification of protein spots by MALDI-TOF MS and LC-ESI-Q-TOF MS/MS. For proteins identified by MALDI-TOF MS, the MASCOT score, peptide tolerance in parts per million (ppm) and the number of matching peptides are provided. For MS/MS identifications, the ProteinLynx GlobalServer score, peptide tolerance in ppm, number of *de novo* sequenced peptides and the respective *de novo* peptide sequences are given.

| Spot ID | TIGR     | Description                                              | MALDI-TOF MS |     |                   | LC-ESI-Q-TOF MS/MS |     |                    |                                                                                                          |
|---------|----------|----------------------------------------------------------|--------------|-----|-------------------|--------------------|-----|--------------------|----------------------------------------------------------------------------------------------------------|
|         |          |                                                          | Score        | ppm | Matching peptides | Score              | ppm | Sequenced peptides | <i>De novo</i> sequences                                                                                 |
| 895     | TC139604 | Late embryogenesis abundant protein, <i>Oryza sativa</i> |              |     |                   | 10.83              | 10  | 2                  | (G)LVAGLIPDAGTVR(C)<br>(C)VPITLDFDDIR(T)                                                                 |
| 900     | TC139604 | Late embryogenesis abundant protein, <i>Oryza sativa</i> |              |     |                   | 10.83              | 10  | 3                  | (G)LVAGLIPDAGTVR(C)<br>(C)VPITLDFDDIR(T)<br>(G)LPIDHVGTTTR(G)<br>(A)SAEAVLEWPK(G)<br>(A)SAEAVLEWPKQDK(C) |
| 968     | TC130772 | Lactoylglutathione lyase, <i>Oryza sativa</i>            |              |     |                   | 10.69              | 10  | 6                  | (A)GNAYAQVAIGTDDVYK(A)<br>(G)SAEAVELVTK(C)<br>(T)ITSFLDPDGWK(T)<br>(A)VVLVDYADFLK(C)                     |
| 777     | TC131046 | S-adenosylmethionine synthetase 1, <i>Hordeum</i>        | 117          | 100 | 12                |                    |     |                    |                                                                                                          |

|      |          |                                                                    |     |     |    |       |    |   |                                                                                                         |
|------|----------|--------------------------------------------------------------------|-----|-----|----|-------|----|---|---------------------------------------------------------------------------------------------------------|
|      |          | <i>vulgare</i>                                                     |     |     |    |       |    |   |                                                                                                         |
| 1161 | TC139656 | Carboxymethylenebutenolidase-like protein,<br><i>Oryza sativa</i>  |     |     |    | 10.83 | 10 | 1 | (C)EDTTFDAYVVGK(C)                                                                                      |
| 955  | TC140370 | Peroxidase, <i>Hordeum vulgare</i>                                 | 140 | 100 | 12 |       |    |   |                                                                                                         |
| 355  | TC146955 | Lipoxygenase 1, <i>Hordeum vulgare</i>                             |     |     |    | 10.83 | 10 | 1 | (T)EVLGVNPNVMITR(G)<br>(T)DPSYAAGWVR(T)<br>(A)SNVQAYYPDVLIR(T)                                          |
| 997  | TC149802 | (1-3)- $\beta$ -glucanase GV, <i>Hordeum vulgare</i>               |     |     |    | 10.83 | 10 | 4 | (G)FDVITNSFPSSGVFR(T)<br>(G)NYNQGLIDHIR(G)                                                              |
| 703  | TC133105 | Cytosolic 6-phosphogluconate dehydrogenase,<br><i>Oryza sativa</i> | 77  | 100 | 10 |       |    |   | (G)ITGLHAAIAK(G)<br>(C)LAPEAQAMR(T)<br>(T)LEYELLAR(A)                                                   |
| 939  | NP315772 | Probable nicotianamine synthase 7, <i>Hordeum vulgare</i>          |     |     |    | 10.83 | 10 | 6 | (G)YVPGGIAPAR(C)<br>(C)GFLYPIVDPQDIGR(T)<br>(A)FGEMVADVTQK(A)<br>(C)VTEEQAATAFR(C)<br>(T)EGAAQAVYVAR(A) |
| 1747 | TC137024 | Not found                                                          |     |     |    | 10.83 | 10 | 2 | (G)GDISQEDLQEK(C)<br>(C)LINAGIVQTR(A)                                                                   |
| 499  | TC139384 | F23N19.10 stress-inducible protein,<br><i>Arabidopsis thaliana</i> |     |     |    | 10.83 | 10 | 2 |                                                                                                         |
| 759  | TC132873 | Putative monodehydroascorbate reductase,                           | 85  | 100 | 12 |       |    |   |                                                                                                         |

|     |          |                                                                  |     |     |    |       |    |                                                                      |
|-----|----------|------------------------------------------------------------------|-----|-----|----|-------|----|----------------------------------------------------------------------|
|     |          | <i>Oryza sativa</i>                                              |     |     |    |       |    |                                                                      |
| 760 | 35_16328 | Putative nuclear RNA binding protein A,<br><i>Oryza sativa</i>   | 65  | 100 | 9  |       |    | (G)SAEAVELVTK(C)                                                     |
| 931 | TC130772 | Lactoylglutathione lyase, <i>Oryza sativa</i>                    |     |     |    | 10.54 | 10 | 4<br>(T)QPGPLPGLNTK(G)<br>(T)ITSFLDPDGWK(T)<br>(A)VVLVDYADFLK(C)     |
| 507 | TC139323 | Poly(A)-binding protein, <i>Triticum aestivum</i>                | 102 | 100 | 12 |       |    | (A)APGVQTPVIVR(A)<br>(C)FSTVVHER(G)<br>(G)DLTDSIAAGNYPEWK(C)         |
| 689 | TC139229 | Catalase 1, <i>Hordeum vulgare</i>                               |     |     |    | 10.83 | 10 | 6<br>(G)TWPEDIPLQPVGR(G)<br>(T)LGPNYLMLPVNAPK(G)<br>(T)DEEVNYFPSR(T) |
| 871 | TC137786 | Iron-deficiency specific protein IDS2,<br><i>Hordeum vulgare</i> | 78  | 100 | 11 |       |    |                                                                      |
| 929 | TC142112 | Iron-deficiency specific protein IDS3,<br><i>Hordeum vulgare</i> | 113 | 100 | 11 |       |    | (C)LPLWPSAQAAR(C)                                                    |
| 942 | TC147014 | Fructokinase 2, <i>Oryza sativa</i>                              |     |     |    | 10.08 | 10 | 5<br>(C)VSDDEVAFLTQGDANDEK(A)<br>(C)LLIVTDGEK(A)<br>(G)DDSIFYNEAK(C) |

(G)GAIPALPTTATALELISK(G)

|      |          |                                                                 |     |     |    |
|------|----------|-----------------------------------------------------------------|-----|-----|----|
| 943  | TC147167 | Iron-deficiency induced protein IDI2,<br><i>Hordeum vulgare</i> | 123 | 100 | 13 |
| 1167 | TC145151 | Iron-deficiency induced protein IDI1,<br><i>Hordeum vulgare</i> | 197 | 100 | 19 |
| 1213 | TC146774 | Glutathione S-transferase F5, <i>Triticum<br/>aestivum</i>      | 73  | 100 | 9  |
| 1228 | TC138639 | 23 kDa jasmonate-induced protein, <i>Hordeum<br/>vulgare</i>    | 82  | 100 | 7  |
| 1069 | TC131931 | Probable L-ascorbate peroxidase 7, <i>Oryza<br/>sativa</i>      | 84  | 100 | 12 |
| 1216 | TC131931 | Probable L-ascorbate peroxidase 7, <i>Oryza<br/>sativa</i>      | 102 | 100 | 15 |
